# Supplementary material
Source: PubMed Central journal article supplement (PMC3449373)
Supplement: 97320630008673S1.pdf [file 97320630008673S1.pdf]

## Supplementary material:

**Table 1:** Ramachandran Plot scores and other protein validations score for 3D model of serine proteinase of *Heterodera glycines* and all Plant serine proteinase inhibitors

| Ramachandran Plot Scores                    | SP_HG | SPI_PG | SPI_PGn | SPI_PO | SPI_VM | SPI_VMn |
|---------------------------------------------|-------|--------|---------|--------|--------|---------|
| % Amino acid in most favored regions        | 73.6% | 82.5%  | 80.6%   | 88.8%  | 90.1%  | 73.7%   |
| % Amino acid in additional allowed regions  | 21.3% | 14.4%  | 16.1%   | 9.0%   | 9.9%   | 22.4%   |
| % Amino acids in generously allowed regions | 3.6%  | 2.1%   | 3.2%    | 1.1%   | 0.0%   | 3.9%    |
| % Amino acids in disallowed regions         | 1.5%  | 1.0%   | 0.0%    | 1.1%   | 0.0%   | 0.0%    |
| ProSA Z-Score                               | -5.82 | -3.49  | -3.44   | -3.49  | -3.13  | -3.76   |
| Errat Score                                 | 86.97 | 78.00  | 95.08   | 75.82  | 81.96  | 77.41   |
| Overall G-factor                            | -0.37 | -0.28  | -0.36   | -0.14  | -0.19  | -0.38   |
| Verfy_3D score                              | 0.73  | 0.35   | 0.51    | 0.38   | 0.33   | 0.51    |

**Table 2:** Most favorable protein interacting residues for SP\_HG and SPIs predicted by the PPI-pried server.

| Proteins | Favorable protein binding site Amino acid                                                                                  |
|----------|----------------------------------------------------------------------------------------------------------------------------|
| SP_HG    | 40A, 41V, 46S, 62H, 66S, 68I,101S,103V,104N, 105N, 107N, 109G, 110Y, 113D, 153R, 158S, 202S, 205S, 221, 222G, 224A, & 225Q |
| SPI_PG   | 44P, 45C, 46C, 47D, 49C, 51C, 53D, 54S, 55I, 56P, 57P, 92T, 94F, 93D 95C, 96Y, &97K                                        |
| SPI_PGn  | 44P, 46C, 47D, 48K, 49C, 50M, 51C, 52A, 53D, 54S, 57P, 58I, 59C, 60Q, 61C, 62T, 94C, 95Y & 107D                            |
| SPI_PO   | 44P, 46C, 47D, 48H, 49C, 50M, 51C, 53D, 54S, 57P, 58I, 59C, 60Q, 61C, 62T, 94C, 95Y & 96K                                  |
| SPI_VM   | 47K, 49C, 51D, 52Q, 53C, 55C, 56T, 57K, 58S, 59I, 61P, 62K, 63C, 64R, 69R, 73C, &102P                                      |
| SP_VMn   | 42S, 45S, 46T, 47P, 48C, 50D, 51L, 52C, 54C, 56P, 57S, 58I, 59P, 60P, 61Q & 62C                                            |

**Table 3:** Various energy values for each best complex of SPIs with SP\_HG generated by Fiber Dock Server. Attractive and Repulsive Van-der wall (VDW) forces for each complex are positive and negative respectively. ACE stand for Atomic Contact Energy whereas HB shows minimum Hydrogen bond energy.

| Sr. No | Proteinase Inhibitors | Global Energy (Kj/mole) | Attractive VDW (Kj/mole) | Repulsive VDW (Kj/mole) | VDW | ACE (Kj/mole) | HB (Kj/mole) |
|--------|-----------------------|-------------------------|--------------------------|-------------------------|-----|---------------|--------------|
| 1      | SPI_PG                | -24.34                  | -21.27                   | 11.38                   |     | -8.91         | -2.19        |
| 2      | SPI_PGn               | -24.08                  | -17.85                   | 15.49                   |     | -12.92        | -1.33        |
| 3      | SPI_PO                | -25.81                  | -17.82                   | 8.79                    |     | -7.39         | -2.16        |
| 4      | SPI_VM                | -23.43                  | -16.24                   | 14.97                   |     | -10.96        | -1.09        |
| 5      | SPI_VMn               | -24.14                  | -14.79                   | 13.62                   |     | -11.79        | -2.91        |
